# Supplementary material for: Support programmes for parents of children with intellectual disabilities: a scoping review protocol
Source: HighWire-hosted journal article supplement (doi:10.1136/bmjopen-2021-049965), 2022-05-01
Supplement: bmjopen-2021-049965supp002_data_supplement.pdf [file bmjopen-2021-049965supp002_data_supplement.pdf]

**Appendix II: Data extraction instrument**

| Author information | Year of publication | Country of origin | Aims/Purpose of the study | Study Population | Methodology | Intervention type | Duration | Outcomes | Key findings related to the study | Intervention name | Type of support | Leadership | Program characteristics |
|--------------------|---------------------|-------------------|---------------------------|------------------|-------------|-------------------|----------|----------|-----------------------------------|-------------------|-----------------|------------|-------------------------|
|                    |                     |                   |                           |                  |             |                   |          |          |                                   |                   |                 |            |                         |
|                    |                     |                   |                           |                  |             |                   |          |          |                                   |                   |                 |            |                         |
|                    |                     |                   |                           |                  |             |                   |          |          |                                   |                   |                 |            |                         |
